# Supplementary material for: The Integration of Metabolomics, Electronic Tongue, and Chromatic Difference Reveals the Correlations between the Critical Compounds and Flavor Characteristics of Two Grades of High-Quality Dianhong Congou Black Tea
Source: MDPI journal article supplement (doi:10.3390/metabo13070864), 2023-07-20
Supplement: s1 [file s1]

## Materials and Methods

### Human sensory evaluation

First, the tea samples were numbered randomly, and 200 g of each tea sample was put into a white square plate for the dry tea appearance evaluation. Second, 4 g of each tea sample was put into a white clean porcelain cup and brewed with 150 mL boiled water. After 5 min, the tea infusion was filtered into a white clean porcelain bowl and the tea infused leaf was kept in the cup for the evaluation of liquor color, aroma, and taste. Third, the infused leaf was placed into a white porcelain plate for the evaluation of infused leaf appearance. Then, the comments and scores of five sensory factors (dry tea appearance, liquor color, aroma, taste, and infused leaf) of tea were given by five certificated tea assessors referring to the Tea Vocabulary for Sensory Evaluation (GB/T 14487-2017) and Methodology for Sensory Evaluation of Tea (GB/T 23776-2018). And then, the final score of each sensory factor was taken as the average of the scores given by the 5 reviewers. Finally, **the overall score of each tea sample was calculated** according to a 100-point scoring system: Total score (100%) = dry tea appearance (25%) + liquor color (10%) + aroma (25%) + taste (30%) + infused leaf appearance (10%).

**Table S1.** Detailed **sensory comments and scores** (dry tea appearance, liquor color, aroma, tea taste, infused leaf appearance, and total score) of the two grades of high-quality DCT evaluated by human sensory evaluation.

| Group | No. | Dry tea appearance (25 %)                         |       | Liquor color (10 %)       |       | Aroma (25 %)                |       | Taste (30 %)                                    |       | Infused leaf (10 %) |       | Total score (100%) |
|-------|-----|---------------------------------------------------|-------|---------------------------|-------|-----------------------------|-------|-------------------------------------------------|-------|---------------------|-------|--------------------|
|       |     | comment                                           | score | comment                   | score | comment                     | score | comment                                         | score | comment             | score |                    |
| BDCT  | 1   | tight and heavy, black bloom, golden tippy        | 96    | red, bright               | 90    | sweet aroma                 | 82    | heavy brisk with umami                          | 86    | red, bright         | 86    | 87.9               |
|       | 2   | tight and heavy, black bloom, golden tippy        | 96    | red, bright               | 91    | high sweet aroma            | 88    | heavy brisk with umami                          | 87    | red, bright         | 88    | 90                 |
|       | 3   | tight and heavy, black bloom, golden tippy        | 96    | red, bright               | 92    | fresh sweet aroma           | 85    | slightly brisk with umami                       | 84    | red, bright         | 90    | 88.65              |
|       | 4   | tight and heavy, black bloom, golden evenly tippy | 97    | slightly red, bright      | 86    | slightly sweet aroma        | 80    | heavy brisk with umami and fruity-like taste    | 84    | red, bright         | 90    | 87.05              |
|       | 5   | tight and heavy, black bloom, golden evenly tippy | 96    | red and brilliant, bright | 96    | high sweet aroma with fresh | 92    | slightly brisk with umami and fruity-like taste | 82    | red, bright         | 90    | 90.2               |
|       | 6   | tight and heavy, black bloom, golden evenly tippy | 96    | slightly red, bright      | 88    | sweet and flowery aroma     | 94    | strong, fresh and brisk, fruity-like taste      | 90    | red, bright         | 88    | 92.1               |

|      |   |                                                                    |    |                                 |    |                                     |    |                                                                                                                                                                                       |    |                            |    |       |
|------|---|--------------------------------------------------------------------|----|---------------------------------|----|-------------------------------------|----|---------------------------------------------------------------------------------------------------------------------------------------------------------------------------------------|----|----------------------------|----|-------|
|      | 7 | fat and blod bud,<br>golden evenly<br>tippy                        | 97 | orange<br>red,<br>bright        | 91 | sweet<br>aroma                      | 82 | less<br>mellow,<br>brisk and<br>umami                                                                                                                                                 | 80 | red,<br>bright             | 86 | 86.45 |
|      | 8 | slightly tight and<br>heavy, black<br>bloom, golden<br>tippy       | 96 | slightly<br>red,<br>bright      | 88 | fresh and<br>sweet<br>aroma         | 89 | heavy<br>brisk<br>with<br>umami<br>and<br>fruity<br>like taste<br>strong,<br>umami,<br>fruity-<br>like taste,<br>with<br>slightly<br>brisk,<br>slightly<br>thick,<br>sweet-<br>mellow | 85 | red,<br>bright             | 89 | 89.45 |
|      | 9 | tight and heavy,<br>black bloom,<br>golden evenly<br>tippy         | 97 | slightly<br>red,<br>bright      | 88 | fresh<br>sweet,<br>flowery<br>aroma | 84 | like taste<br>strong,<br>umami,<br>fruity-<br>like taste,<br>with<br>slightly<br>brisk,<br>slightly<br>thick,<br>sweet-<br>mellow                                                     | 83 | red,<br>bright             | 87 | 87.65 |
|      | 1 | tight and heavy,<br>bent, black<br>bloom, slightly<br>golden tippy | 94 | red and<br>brilliant,<br>bright | 94 | sweet<br>aroma                      | 84 | thick and<br>mellow,<br>sweet                                                                                                                                                         | 82 | red,<br>bright             | 92 | 87.7  |
|      | 2 | tight and heavy,<br>bent, black<br>bloom, slightly<br>golden tippy | 95 | red,<br>slightly<br>bright      | 87 | sweet<br>aroma                      | 86 | thick and<br>mellow,<br>sweet                                                                                                                                                         | 88 | red,<br>slightly<br>bright | 86 | 88.95 |
|      | 3 | tight and heavy,<br>bent, black<br>bloom, slightly<br>golden tippy | 94 | red,<br>slightly<br>bright      | 87 | sweet<br>aroma                      | 88 | thick and<br>mellow,<br>sweet                                                                                                                                                         | 87 | red,<br>slightly<br>bright | 86 | 88.9  |
|      | 4 | tight and heavy,<br>bent, black<br>bloom, slightly<br>golden tippy | 94 | red,<br>slightly<br>bright      | 88 | less sweet<br>aroma                 | 80 | slightly<br>sweet-<br>mellow                                                                                                                                                          | 82 | red,<br>bright             | 88 | 85.7  |
| SDCT | 5 | tight and heavy,<br>bent, black<br>bloom, slightly<br>golden tippy | 94 | red,<br>slightly<br>bright      | 88 | sweet<br>aroma                      | 84 | slightly<br>thick and<br>sweet-<br>mellow                                                                                                                                             | 84 | red,<br>bright             | 87 | 87.2  |
|      | 6 | tight and heavy,<br>bent, black<br>bloom, with<br>golden tippy     | 93 | red,<br>slightly<br>bright      | 87 | sweet<br>aroma                      | 84 | sweet,<br>thick and<br>mellow                                                                                                                                                         | 85 | red,<br>slightly<br>bright | 86 | 87.05 |
|      | 7 | tight and heavy,<br>bent, black<br>bloom, with<br>golden tippy     | 93 | red and<br>brilliant            | 94 | high<br>sweet<br>aroma              | 92 | thick and<br>mellow                                                                                                                                                                   | 88 | red,<br>bright             | 92 | 91.25 |
|      | 8 | tight and heavy,<br>bent, black<br>bloom, with<br>golden tippy     | 93 | red,<br>slightly<br>bright      | 88 | sweet<br>aroma                      | 84 | slightly<br>sweet-<br>mellow                                                                                                                                                          | 82 | red,<br>slightly<br>bright | 85 | 86.15 |
|      | 9 | tight and heavy,<br>bent, black<br>bloom, slightly<br>golden tippy | 92 | red,<br>slightly<br>bright      | 87 | high<br>sweet<br>aroma              | 89 | thick and<br>sweet-<br>mellow                                                                                                                                                         | 87 | red,<br>bright             | 89 | 88.95 |

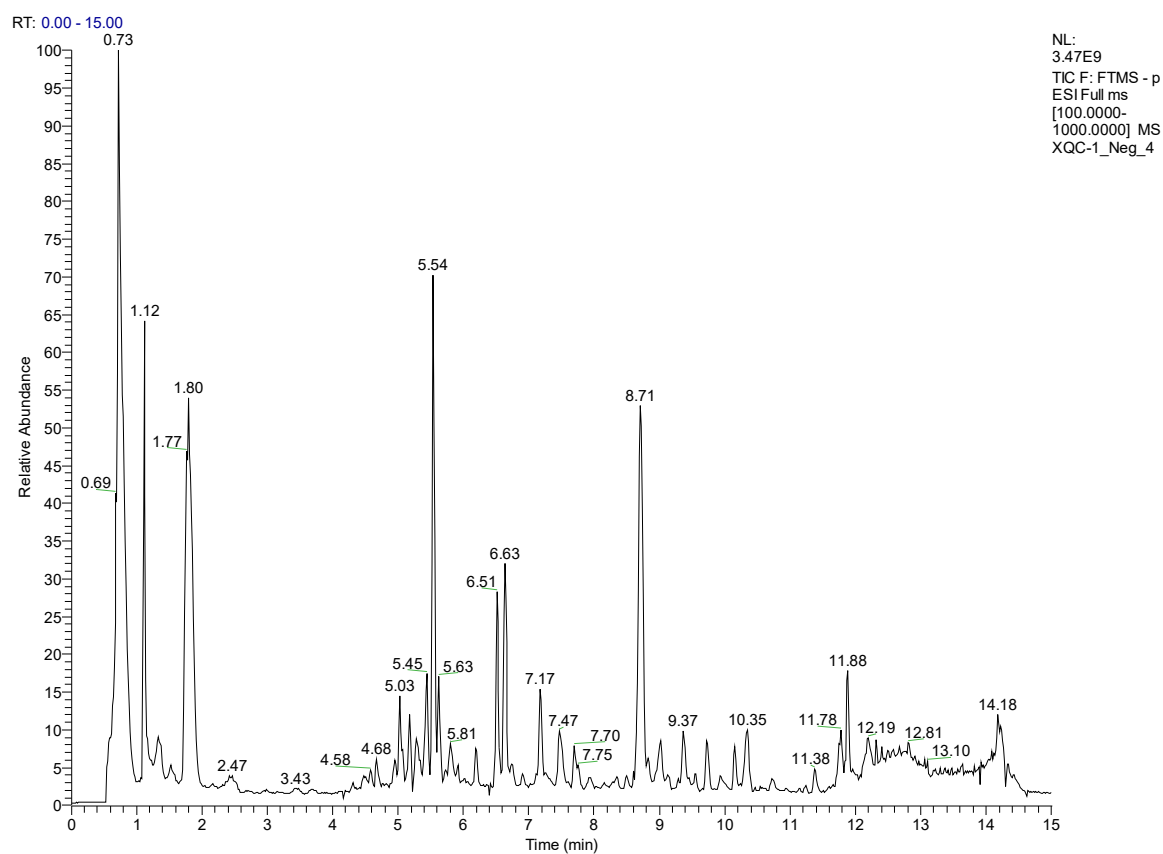

**Figure S1.** The typical chromatogram of total ions acquired from the metabolomics analysis.

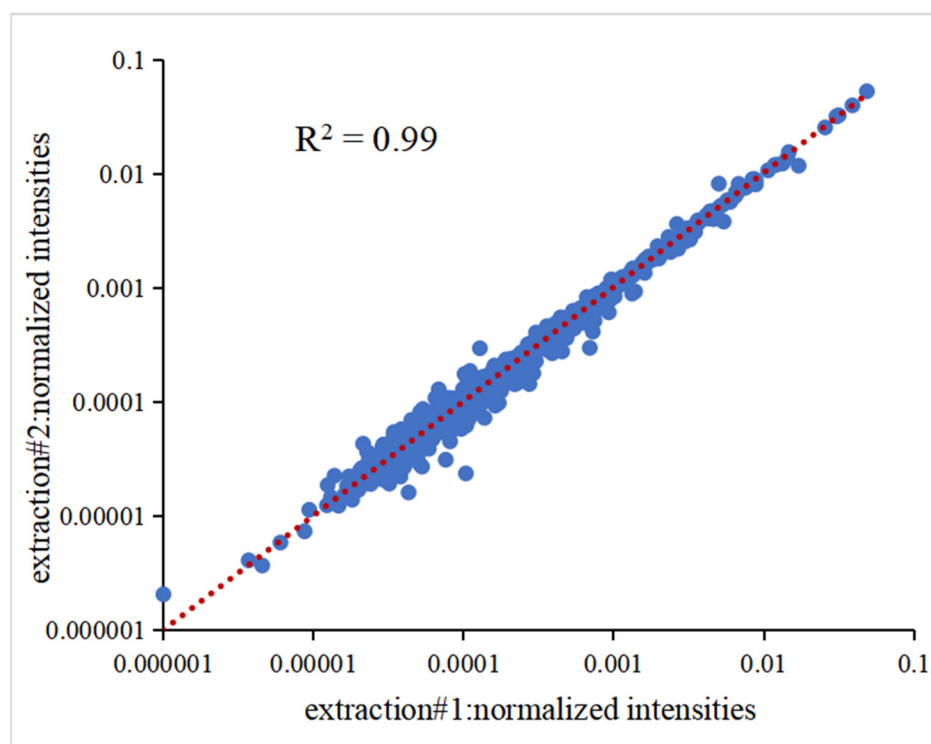

**Figure S2.** Scatter plot of normalized intensities of all detected ions in the two replicate extractions.
